# Supplementary material
Source: publisher figshare collection journal article supplement (https://acs.figshare.com/ndownloader/files/21245238)
Supplement: Supplementary file 1 [file 21245238]

## *Supporting Information*

Highly thermally conductive polyimide composite  
films with excellent thermal and electrical  
insulating properties

*Xuhua He, Yuechuan Wang\**

College of Polymer Science and Engineering, State Key Laboratory of Polymer Materials  
Engineering, Sichuan University, Chengdu 610065, China

\*Corresponding author: [wangyc@scu.edu.cn](mailto:wangyc@scu.edu.cn)

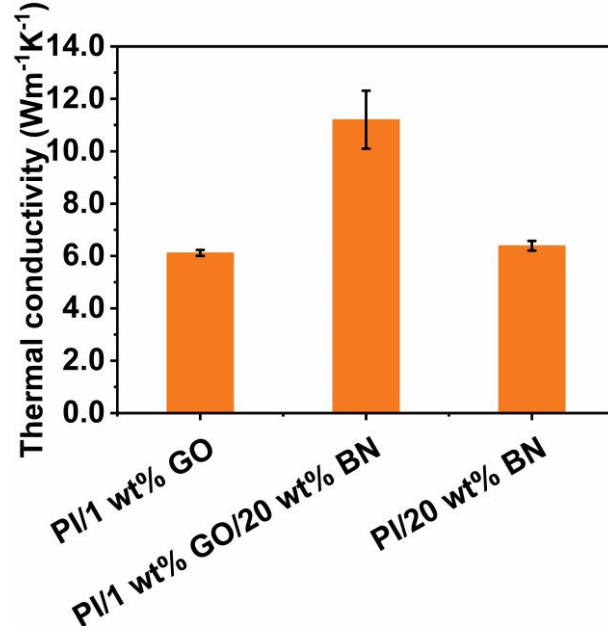

**Figure S1.** Comparison of the thermal conductivity of PI composites with various fillers.

## Theoretical derivations of the thermal conductivity

To theoretically analyze the experimental data, we applied the modified effective medium theory (EMT) model, which works well for multi-phase composites.<sup>1, 2</sup> And the effective thermal conductivity ( $K^*$ ) of the composites with  $i$  kinds of ellipsoidal fillers obeys the following formula

$$\frac{K^*}{K_m} = \frac{\sum_i [2\beta_x^i (L_x^i - 1) + \beta_z^i (L_z^i - 1)] f_i / 3 - 1}{\sum_i (2\beta_x^i L_x^i + \beta_z^i L_z^i) f_i / 3 - 1} \quad (1)$$

with

$$\beta_x^i = \frac{K_x^i - K_m}{K_m + L_x^i (K_x^i - K_m)} \quad (2)$$

$$\beta_z^i = \frac{K_z^i - K_m}{K_m + L_z^i (K_z^i - K_m)} \quad (3)$$

where  $K_m$  is the thermal conductivity of the polymer matrix.  $K_x$  and  $K_z$  represent the thermal conductivities of the ellipsoidal particles along transverse and longitudinal axis, respectively;  $f$  is the volume fraction of fillers, and the volume fraction of hybrid fillers with  $i$  types satisfies the relationship:  $f = \sum_i f_i$ ,  $L_x$  and  $L_z$  are the proverbial geometrical depolarization factors dependent on the particle aspect ratio  $p$  and given by

$$L_x = \begin{cases} \frac{p^2}{2(p^2 - 1)} - \frac{p^2}{2(p^2 - 1)^{3/2}} \cosh^{-1} p, & p > 1 \\ \frac{p^2}{2(p^2 - 1)} + \frac{p^2}{2(p^2 - 1)^{3/2}} \cosh^{-1} p, & p < 1 \end{cases}, \quad (4)$$

$$L_z = 1 - 2L_x.$$

For the special case of the composites with hybrid BN platelets and TGO nanosheets, we can further simplify the formula (1). Usually,  $p$  of typical BN and TGO are less than 0.01, resulting in  $L_x=0$ ,  $L_z=1$  for both BN and TGO. In addition, because the thermal conductivities of BN and TGO are much higher than that of polymer matrix, we can obtain  $\beta_x^1 = K_x^1/K_m$ ,  $\beta_z^1 = 1$  for BN, and  $\beta_x^2 = K_x^2/K_m$ ,  $\beta_z^2 = 1$  for TGO.

In the hybrid BN/TGO polymer composites, the filler-matrix interfacial thermal resistance ( $R_k$ ) is of significance. In order to consider such an effect,  $R_k$  of BN or TGO can be assumed as a composite unit cell coated with a very thin interfacial thermal barrier layer with thickness  $d$  and thermal conductivity  $K_s$ .  $R_k$  is then defined as  $R_k = \lim_{d \rightarrow 0, K_s \rightarrow 0} d/K_s$ . Therefore, the effective thermal conductivities of BN and TGO are given by

$$K_1^* = \frac{K_1}{2R_k K_1/l_1 + 1}, K_2^* = \frac{K_2}{2R_k K_2/l_2 + 1}, \quad (5)$$

where  $K_1^*$ ,  $K_1$ , and  $l_1$  represent the effective thermal conductivity, thermal conductivity, and length of the BN, respectively. And  $K_2^*$ ,  $K_2$ , and  $l_2$  represent the effective thermal conductivity,

thermal conductivity, and length of the TGO, respectively. The relevant parameters are in **Table S1**.

As a result, the formula (1) for the thermal conductivity enhancement is ultimately simplified as

$$\frac{K^*}{K_m} = \frac{3 + 2f_1(K_1^*/K_m) + 2f_2(K_2^*/K_m)}{3 - (f_1 + f_2)} \quad (6)$$

**Table S1.** The detailed parameters for calculation.

|                                                          | BN                | TGO                | PI matrix |
|----------------------------------------------------------|-------------------|--------------------|-----------|
| Thermal conductivity (Wm <sup>-1</sup> K <sup>-1</sup> ) | ~400 <sup>3</sup> | ~1500 <sup>4</sup> | 0.223     |
| Density (g cm <sup>-3</sup> )                            | 2.29              | ~2.20 <sup>5</sup> | 1.437     |
| Geometry parameters (measured by SEM)                    |                   |                    |           |
| BN length                                                |                   | 20 μm              |           |
| BN width                                                 |                   | 10 μm              |           |
| BN thickness                                             |                   | 200 nm             |           |
| TGO length                                               |                   | 80 μm              |           |
| TGO width                                                |                   | 30 μm              |           |

## References

- (1) Chu, K.; Li, W.-s.; Jia, C.-c.; Tang, F.-l. Thermal conductivity of composites with hybrid carbon nanotubes and graphene nanoplatelets. *Appl. Phys. Lett.* **2012**, 101, 211903.
- (2) Wang, Z.-G.; Gong, F.; Yu, W.-C.; Huang, Y.-F.; Zhu, L.; Lei, J.; Xu, J.-Z.; Li, Z.-M. Synergetic enhancement of thermal conductivity by constructing hybrid conductive network in the segregated polymer composites. *Compos. Sci. Technol.* **2018**, 162, 7.
- (3) Weng, Q.; Wang, X.; Wang, X.; Bando, Y.; Golberg, D. Functionalized hexagonal boron nitride nanomaterials: emerging properties and applications. *Chem. Soc. Rev.* **2016**, 45, 3989.
- (4) Balandin, A. A. Thermal properties of graphene and nanostructured carbon materials. *Nat. Mater.* **2011**, 10, 569.
- (5) Wu, Z.-S.; Zhou, G.; Yin, L.-C.; Ren, W.; Li, F.; Cheng, H.-M. Graphene/metal oxide composite electrode materials for energy storage. *Nano Energy* **2012**, 1, 107.
